# Supplementary material for: Outcomes of Patients with Lower Limb Loss after Using a Training Prosthesis: A Retrospective Case Series Study
Source: Preprints.org preprint supplement (doi:10.20944/preprints202312.2205.v1), 2023-12-28
Supplement: Supplementary file 1 [file supplementary]

**Table S.1. Characteristics of the matched population (n=90)**

|  | Rehabilitation with TP  (n=45) | Rehabilitation without TP  (n=45) | *p*-Valuea |
| --- | --- | --- | --- |
| **Sex** *(men)* | 32 (71.1) | 32 (71.1) | 1 |
| **Age** *(years)* | 64 (55-70) | 62 (55.5-70.5) | 0.67 |
| **BMI** *(kg/m²)* | 23.4 (20.6-29.7) | 26.5 (20.9-31.4) | 0.22 |
| **Vascular etiology** *(yes)* | 2 (4.44) | 5 (11.1) | 0.43b |
| **Site of amputation**  Unilateral above-knee amputation *(yes)*  Unilateral below-knee amputation *(yes)*  Bilateral *(yes)* | 24 (53.3)  20 (44.4)  1 (2.22) | 16 (35.5)  27 (60.0)  2 (4.44) | 0.23 |
| **Time between amputation and entrance into the rehabilitation center** *(days)* | 17 (11-27) | 20 (14-28) | 0.20 |

TP: Training Prothesis; BMI: Body Mass Index

Qualitative variables are expressed in absolute (n) and relative (%) frequencies; quantitative variables are expressed in median and interquartile range (P25-P75)

ap-values obtained from the Mann-Whitney U test for continuous variables and the X² test for categorial variables

b p-value obtained from the exact Fisher test

**Table S.2. Outcomes associated with rehabilitation with or without TP in matched population (n=90)**

|  | n | Rehabilitation with TP | Rehabilitation without TP | *p*-Valuea |
| --- | --- | --- | --- | --- |
| **Orientation at discharge**  Back to home  To nursing facilities | 90 | 38 (84.4)  7 (15.5) | 41 (91.1)  4 (8.89) | 0.33 |
| **Length of stay in rehabilitation center (days)** | 88 | 70 (54-92) | 99 (80-154) | <0.001 |
| **Number of sockets required**  1 socket  2 sockets  **Interventions for size adaptation of the first socket of EP** | 86  86 | 42 (97.7)  1 (2.32)  1 (0-2) | 37 (86.1)  6 (13.9)  0 (0-1) | 0.049  0.38 |
| **Functional group**  Group 0  Group 2  Group 3  Group 4  Group 5 | 71 | 10 (24.4)  2 (4.88)  18 (43.9)  5 (12.2)  6 (14.6) | 4 (13.3)  1 (3.33)  16 (53.3)  5 (16.7)  4 (13.3) | 0.78 |

TP: Training Prothesis; EP: Evaluation prothesis

Qualitative variables are expressed in absolute (n) and relative (%) frequencies; quantitative variables are expressed in median and interquartile range (P25-P75)

ap-values obtained from the Mann-Whitney U test for continuous variables and the X² test for categorial variables
